# Supplementary figures and images for: An online database for plant image analysis software tools
Source: Springer Nature journal article supplement (doi:10.1186/1746-4811-9-38), 2013-01-01

# A

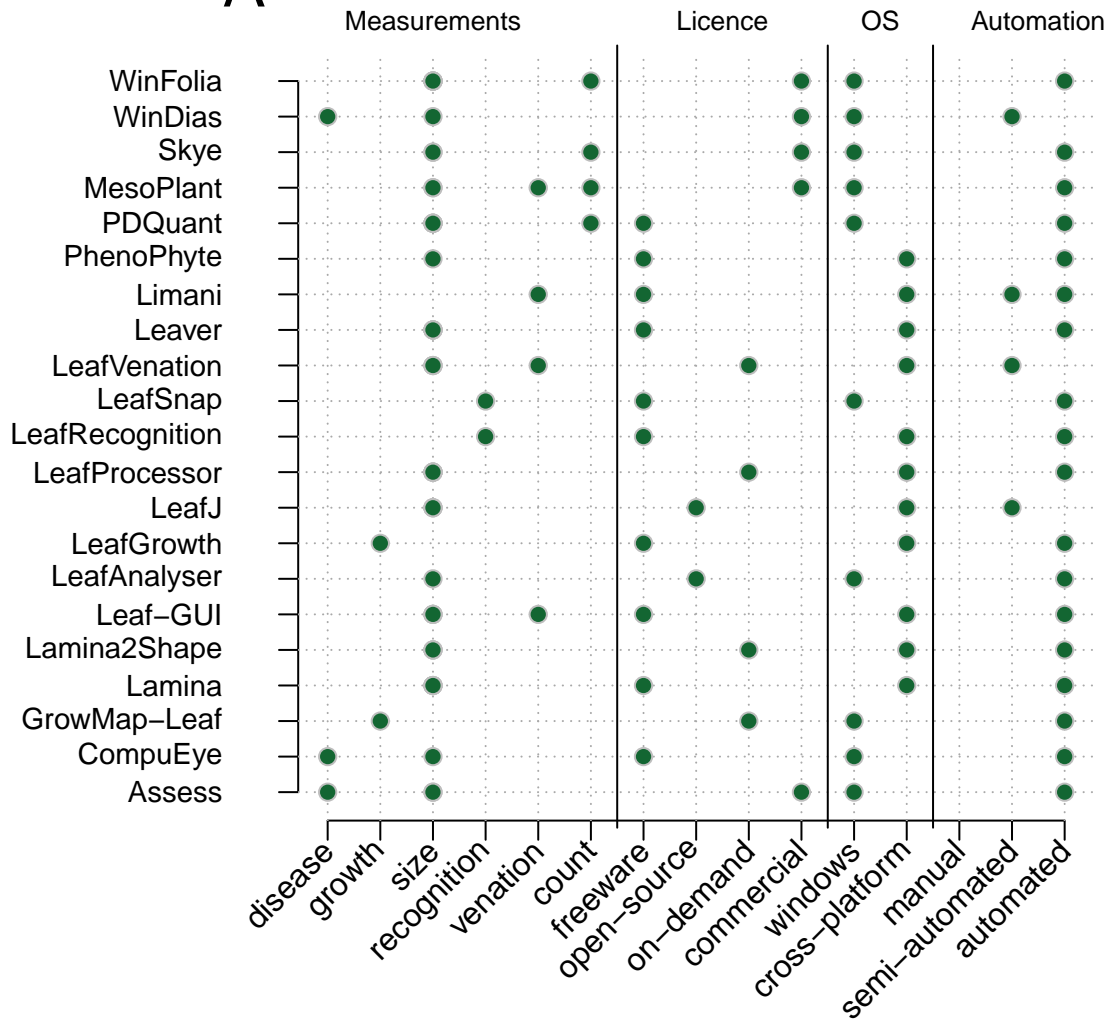

# B

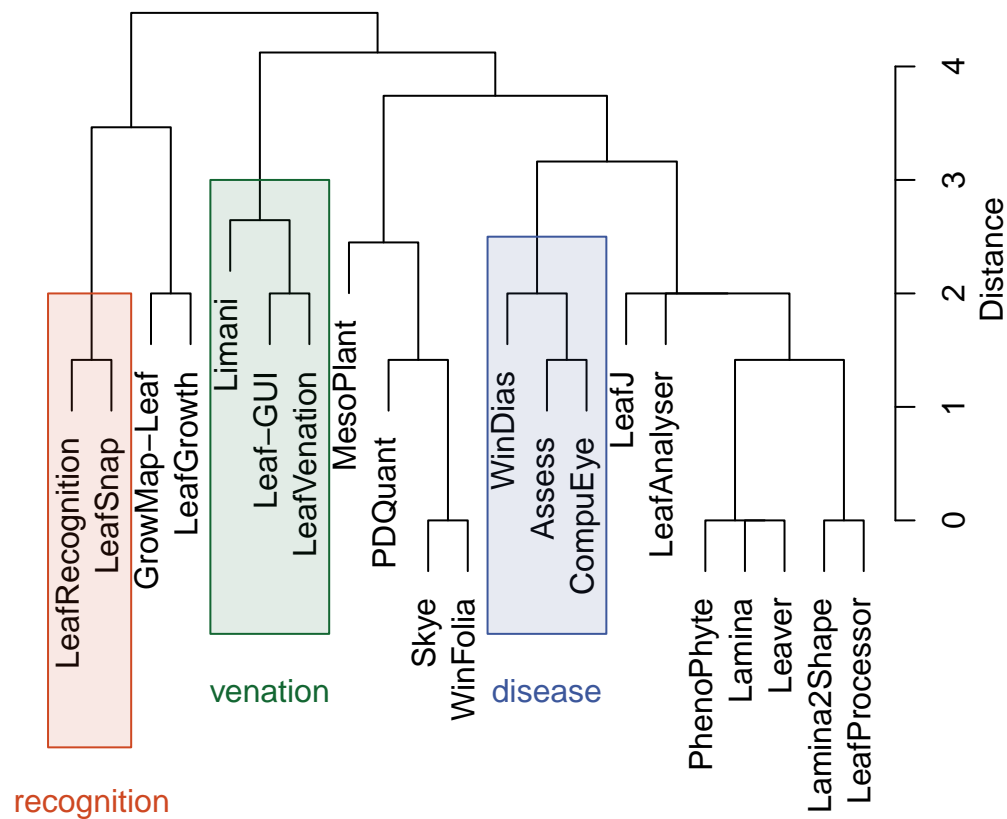

Supplement: 13007_2013_312_MOESM6_ESM.pdf [file 13007_2013_312_MOESM6_ESM.pdf]
